# Supplementary material for: MAGE-A3 regulates tumor stemness in gastric cancer through the PI3K/AKT pathway
Source: publisher site journal article supplement (doi:10.18632/aging.204373), 2022-11-08
Supplement: Supplementary file [file aging-v14i23-204373-supplementary-material-SD1.pdf]

# SUPPLEMENTARY FIGURES

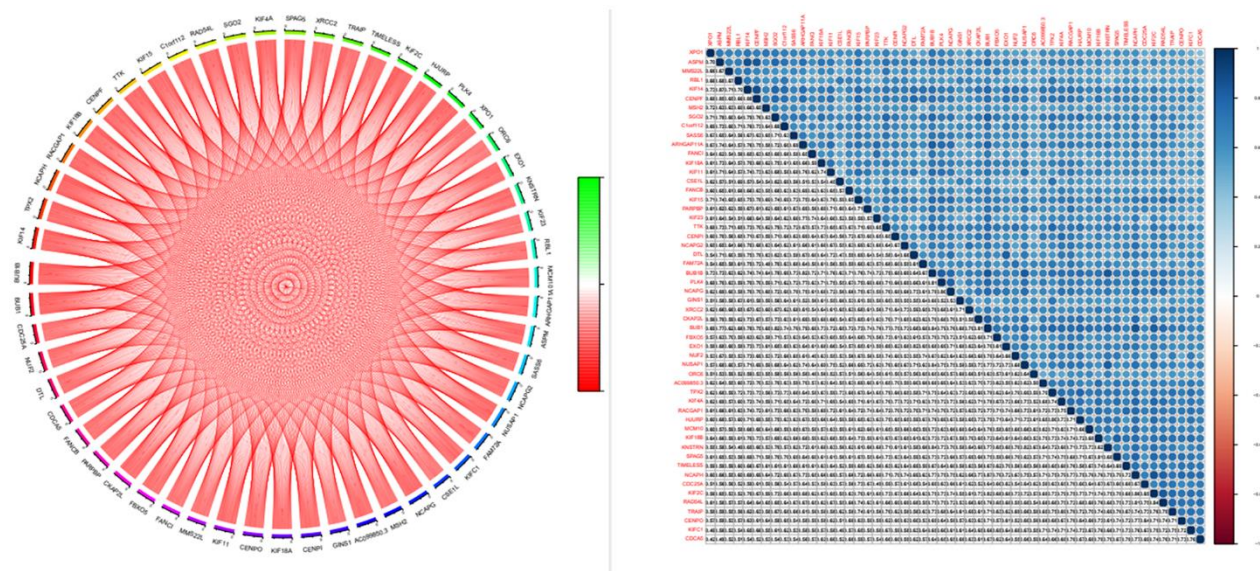

Supplementary Figure 1. Correlation between key genes.

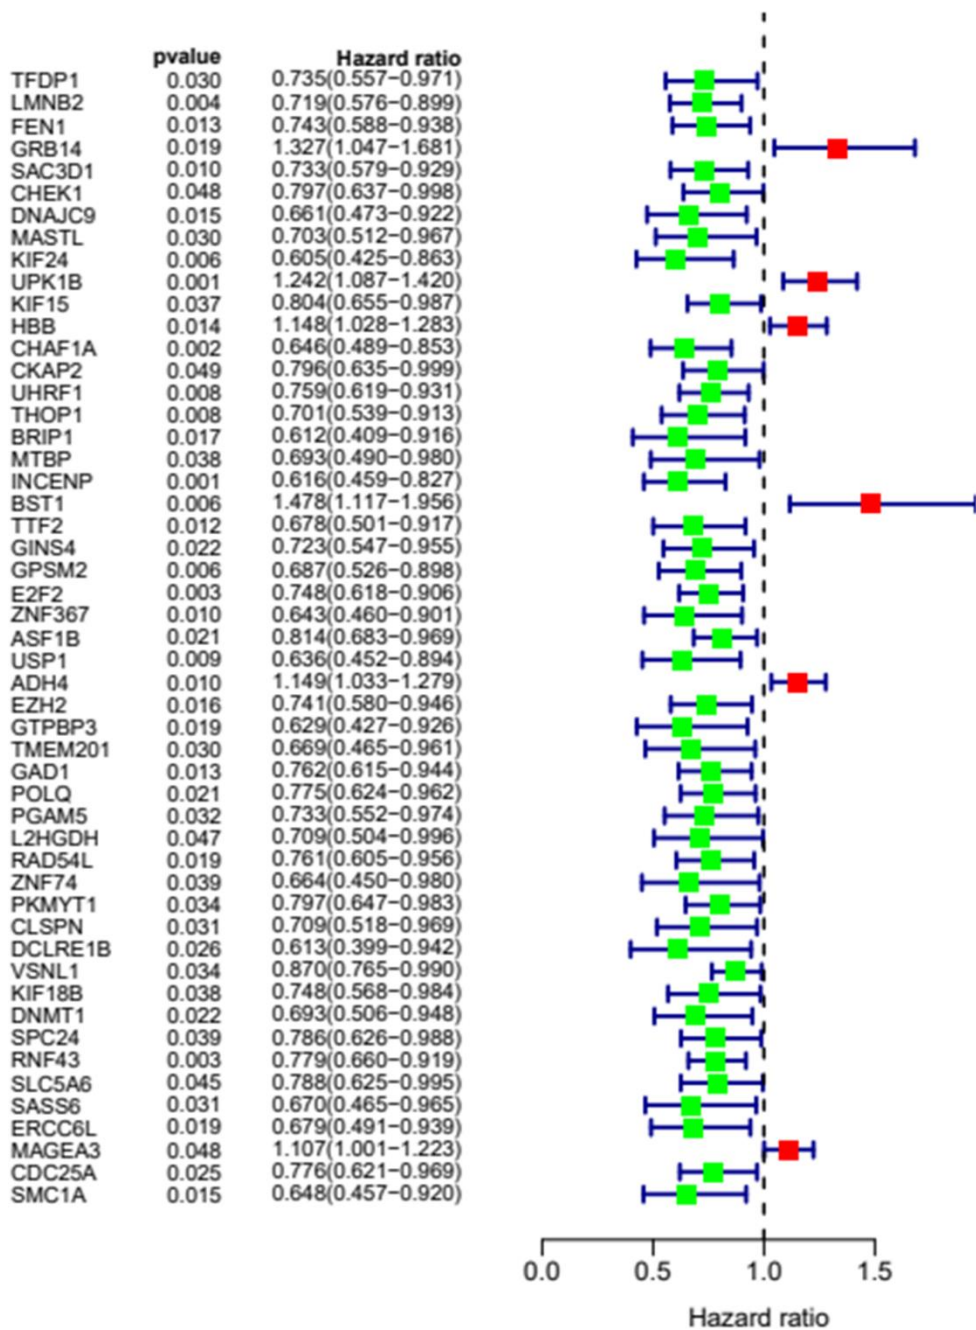

Supplementary Figure 2. Univariate Cox analysis of the prognostic value of key genes.

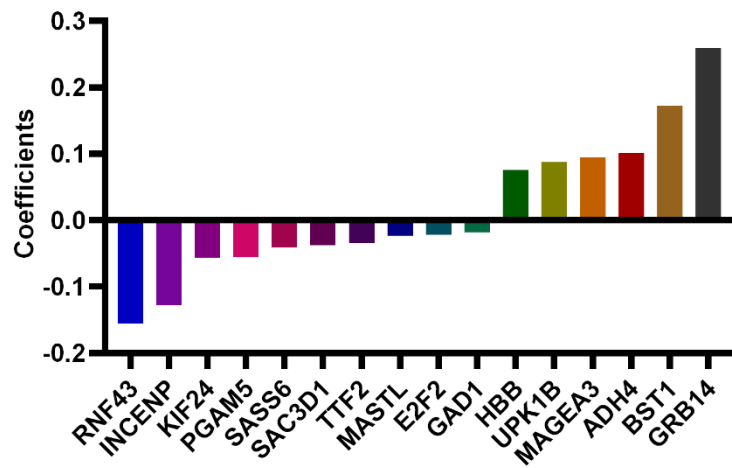

**Supplementary Figure 3.** The 16 genes were selected by least absolute shrinkage and selection operator. (LASSO) Cox analysis in TCGA dataset and histogram of coefficient.
